# Supplementary material for: Social patterning of childhood overweight in the French national ELFE cohort
Source: PubMed Central journal article supplement (PMC10713558; doi:10.1038/s41598-023-48431-8), 2023-12-11
Supplement: 41598_2023_48431_MOESM1_ESM.pdf [file 41598_2023_48431_MOESM1_ESM.pdf]

Supplementary Table 1: Comparison of included and excluded children aged 3.5 years in the ELFE national cohort (n = 18,329) (unweighted data)

|                                                        | Included<br>N = 9 250 | Excluded<br>N = 9 079 | p-value <sup>†</sup> |
|--------------------------------------------------------|-----------------------|-----------------------|----------------------|
| <b>Sex of the child</b>                                |                       |                       |                      |
| Girl                                                   | 48.9% (4 519)         | 48.3% (4 340)         | 0.5                  |
| <b>Maternal age at delivery (years)</b>                | 31.0 (28.0–35.0)      | 30.0 (26.0–34.0)      | <0.001               |
| <b>Parity</b>                                          |                       |                       | <0.001               |
| First-time mother                                      | 48.1% (4 386)         | 43.7% (3 863)         |                      |
| Second-time mother                                     | 35.9% (3 279)         | 33.6% (2 968)         |                      |
| Multiparous                                            | 16.0% (1 457)         | 22.7% (2 004)         |                      |
| <b>Single motherhood</b>                               |                       |                       | <0.001               |
| Yes                                                    | 2.5% (221)            | 6.2% (462)            |                      |
| <b>Maternal migration status</b>                       |                       |                       | <0.001               |
| Non-immigrant                                          | 81.7% (7 355)         | 76.3% (5 650)         |                      |
| Descendant of immigrant                                | 9.8% (878)            | 11.4% (844)           |                      |
| Immigrant                                              | 8.5% (765)            | 12.3% (915)           |                      |
| <b>Maternal country of birth</b>                       |                       |                       | <0.001               |
| France                                                 | 90.3% (8 347)         | 83.5% (7 466)         |                      |
| European Union                                         | 2.3% (213)            | 2.1% (188)            |                      |
| Turkey and Maghreb                                     | 3.3% (301)            | 6.7% (600)            |                      |
| Sub-Saharan Africa                                     | 2.4% (222)            | 5.0% (447)            |                      |
| Other                                                  | 1.8% (164)            | 2.7% (239)            |                      |
| <b>Maternal education level</b>                        |                       |                       | <0.001               |
| ≥ 3-year university                                    | 43.5% (3 886)         | 27.2% (2 000)         |                      |
| 1- to 2-year university                                | 24.0% (2 142)         | 19.7% (1 451)         |                      |
| ≤ High school                                          | 32.5% (2 900)         | 53.1% (3 902)         |                      |
| <b>Maternal occupational category</b>                  |                       |                       | <0.001               |
| Executive and top management                           | 21.1% (1 955)         | 12.4% (1,115.0)       |                      |
| Middle occupation                                      | 26.7% (2 469)         | 17.1% (1,545.0)       |                      |
| Farmer and skilled blue-collar worker                  | 3.4% (310)            | 4.0% (363.0)          |                      |
| Clerk                                                  | 43.5% (4 028)         | 50.2% (4,532.0)       |                      |
| Manual worker, unemployed, student                     | 5.3% (488)            | 16.2% (1 465)         |                      |
| <b>Household income per consumption unit (€/month)</b> | 1 619 (1 238–2 048)   | 1,389 (952–1,778)     | <0.001               |
| <b>Maternal BMI (kg/m<sup>2</sup>)</b>                 | 22.1 (20.2–25.1)      | 22.4 (20.2–25.8)      | <0.001               |
| <b>Maternal weight status</b>                          |                       |                       | <0.001               |
| Thin                                                   | 7.2% (660)            | 8.5% (747)            |                      |
| Normal                                                 | 67.4% (6 143)         | 61.7% (5 421)         |                      |
| Overweight                                             | 25.4% (2 315)         | 29.8% (2 614)         |                      |
| <b>Paternal BMI (kg/m<sup>2</sup>)</b>                 | 24.3 (22.4–26.8)      | 24.5 (22.3–27.0)      | 0.7                  |
| <b>Paternal weight status</b>                          |                       |                       | >0.9                 |
| Thin                                                   | 0.8% (6)              | 0.9% (3)              |                      |

|                                   |               |               |        |
|-----------------------------------|---------------|---------------|--------|
| Normal                            | 57.0% (405)   | 56.0% (183)   |        |
| Overweight                        | 42.2% (300)   | 43.1% (141)   |        |
| <b>Weight for gestational age</b> |               |               | 0.001  |
| Small-for-gestational-age         | 6.7% (610)    | 8.1% (716)    |        |
| Appropriate-for-gestational-age   | 88.3% (8 035) | 87.1% (7 664) |        |
| Large-for-gestational-age         | 5.0% (453)    | 4.8% (421)    |        |
| <b>Type of delivery</b>           |               |               | <0.001 |
| Spontaneous delivery              | 67.4% (6 189) | 67.2% (5 982) |        |
| Forceps, spatulas, suction cups   | 13.3% (1 219) | 11.4% (1 017) |        |
| Caesarean section                 | 17.5% (1 603) | 19.4% (1 724) |        |
| Unknown                           | 1.9% (170)    | 2.0% (175)    |        |
| <b>Gestational diabetes</b>       |               |               |        |
| Yes                               | 7.1% (629)    | 8.0% (683)    | 0.029  |
| <b>Smoking during pregnancy</b>   |               |               |        |
| Yes                               | 16.9% (1 547) | 23.5% (2 077) | <0.001 |

---

Data are median (IQR) unless otherwise indicated.

<sup>1</sup> Wilcoxon rank sum test; Pearson's chi-squared test; Fisher's exact test

Supplementary Table 2: Unweighted multivariable associations of overweight status and socio-economic position and maternal migration status for children aged 3.5 years in the ELFE national birth cohort (complete cases, n = 8 524)

| Characteristics                       | Model 1 |           |         | Model 2 |           |         | Model 3 |           |         | Model 4 |           |         |
|---------------------------------------|---------|-----------|---------|---------|-----------|---------|---------|-----------|---------|---------|-----------|---------|
|                                       | OR      | 95% CI    | p-value | OR      | 95% CI    | p-value | OR      | 95% CI    | p-value | OR      | 95% CI    | p-value |
| <b>Maternal migration status</b>      |         |           | <0.001  |         |           | <0.001  |         |           | <0.001  |         |           | <0.001  |
| Non-immigrant                         | —       | —         |         | —       | —         |         | —       | —         |         | —       | —         |         |
| Descendant of immigrant               | 1.36    | 1.03–1.77 |         | 1.32    | 1.00–1.71 |         | 1.32    | 1.00–1.72 |         | 1.31    | 0.99–1.70 |         |
| Immigrant                             | 2.25    | 1.76–2.86 |         | 2.20    | 1.71–2.81 |         | 2.04    | 1.58–2.60 |         | 1.93    | 1.49–2.49 |         |
| <b>Maternal education level</b>       |         |           |         |         |           | <0.001  |         |           | 0.10    |         |           | 0.2     |
| ≥ 3-year university                   |         |           |         | —       | —         |         | —       | —         |         | —       | —         |         |
| 1-year to 2-year university           |         |           |         | 1.34    | 1.07–1.68 |         | 1.23    | 0.97–1.56 |         | 1.21    | 0.95–1.54 |         |
| ≤ High school                         |         |           |         | 1.61    | 1.31–1.97 |         | 1.29    | 1.01–1.65 |         | 1.19    | 0.93–1.54 |         |
| <b>Maternal occupational category</b> |         |           |         |         |           |         |         |           | <0.001  |         |           | <0.001  |
| Executive and top management          |         |           |         |         |           |         | —       | —         |         | —       | —         |         |
| Middle occupation                     |         |           |         |         |           |         | 1.14    | 0.86–1.53 |         | 1.11    | 0.82–1.50 |         |
| Farmer and skilled blue-collar worker |         |           |         |         |           |         | 1.45    | 0.86–2.34 |         | 1.34    | 0.79–2.19 |         |
| Clerk                                 |         |           |         |         |           |         | 1.35    | 1.01–1.81 |         | 1.28    | 0.94–1.74 |         |
| Manual worker, unemployed, student    |         |           |         |         |           |         | 2.84    | 1.87–4.30 |         | 2.54    | 1.64–3.92 |         |
| <b>Income per consumption unit</b>    |         |           |         |         |           |         |         |           |         |         |           | 0.2     |
| Quintile 5                            |         |           |         |         |           |         |         |           |         | —       | —         |         |
| Quintile 4                            |         |           |         |         |           |         |         |           |         | 0.94    | 0.71–1.26 |         |
| Quintile 3                            |         |           |         |         |           |         |         |           |         | 1.19    | 0.88–1.61 |         |
| Quintile 2                            |         |           |         |         |           |         |         |           |         | 1.14    | 0.84–1.56 |         |
| Quintile 1                            |         |           |         |         |           |         |         |           |         | 1.35    | 0.97–1.88 |         |

<sup>1</sup> OR: odds ratio, CI: confidence interval, Results adjusted on the sex of the child, age of the mother and parity.

\*Results adjusted on the sex of the child, age of the mother and parity. According to the four-nested-variables logistic regression method, the results of each variable are assessed when it is first introduced in the model.
